# Supplementary material for: Microglia-containing cerebral organoids derived from induced pluripotent stem cells for the study of neurological diseases
Source: PubMed Central journal article supplement — iScience. 2023 Feb 24;26(3):106267. doi: 10.1016/j.isci.2023.106267 (PMC10014280; doi:10.1016/j.isci.2023.106267), 2023-02-24
Supplement: mmc1.pdf [file mmc1.pdf]

iScience, Volume 26

## **Supplemental information**

### **Microglia-containing cerebral organoids derived from induced pluripotent stem cells for the study of neurological diseases**

**Yiling Hong, Xu Dong, Lawrence Chang, Chen Xie, Mariann Chang, Jose S. Aguilar, Jimmy Lin, Juncheng Lin, and Qingshun Q. Li**

## Supplementary Figures

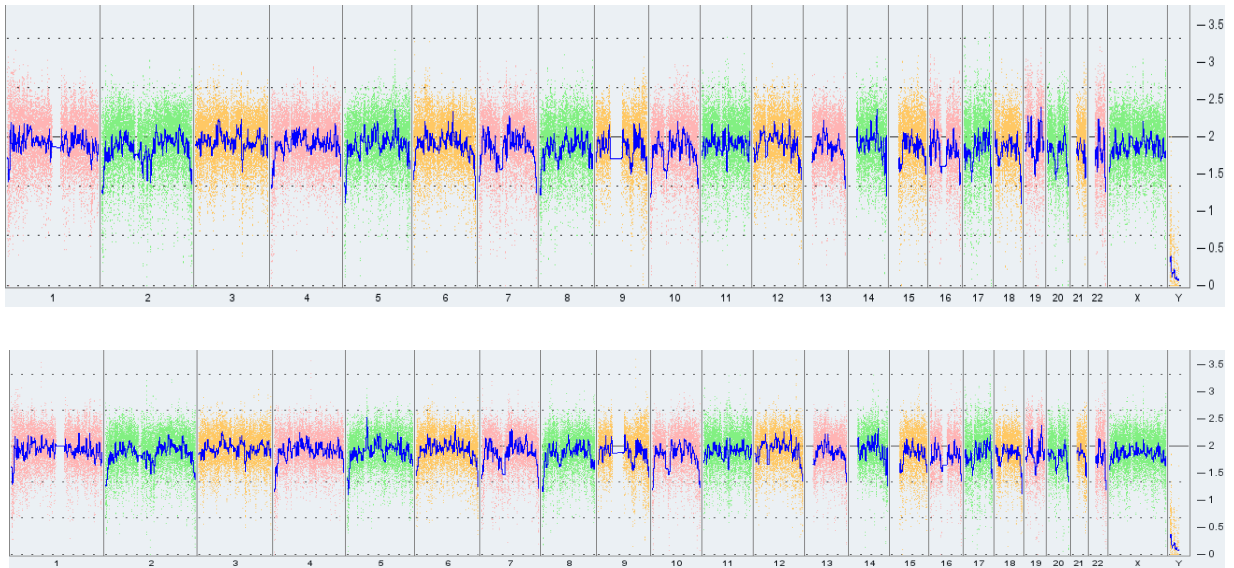

**Figure S1, related to figure 2. Karyotyping in whole genome views.** KaryoStat-based analysis revealed that the sample originated from a female. No chromosomal aberrations were found either in ALS-PDC-affected or ALS-PDC-unaffected iPSCs. The whole-genome view displays all somatic and sex chromosomes in one frame with high-level copy number. The smooth signal plot (right y-axis) is the smoothing of the log<sub>2</sub> ratios that depict the signal intensities of probes in the microarray. A value of 2 represents a normal copy number state (CN=2). A value of 3 represents chromosomal gain (CN=3). A value of 1 represents chromosomal loss (CN=1). The pink, green, and yellow colors indicate the raw signal for each chromosome probe; the blue signal represents the normalized probe signal used to identify copy number and aberrations (if any). The top panel refers to ALS-PDC-unaffected iPSCs and the bottom panel to ALS-PDC-affected iPSCs.

**A.**

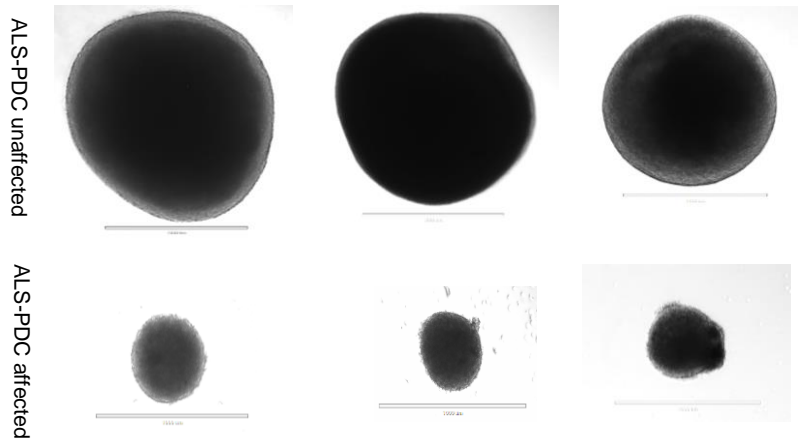

**B.**

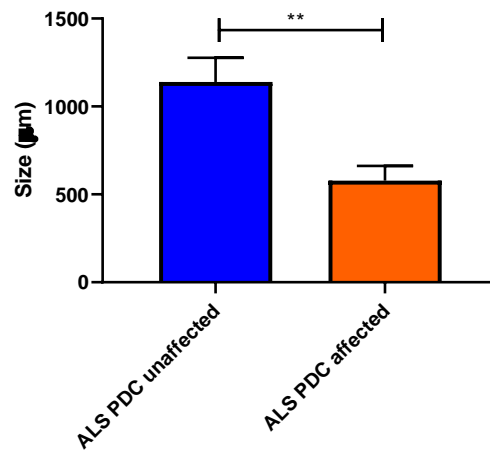

**Figure S2, related to figure 2. Organoid size comparisons. (A)** Phase-contrast images of selected ALS-PDC-affected and -unaffected organoids. **(B)** Quantification of organoid size. All data were obtained from three separate images and compared to the ALS-PDC-unaffected conditions: \*\* $p < 0.01$ , error bars=SEM.

**Table S1, related to figure 6. Primers used for the qPCR analyses**

| Gene          | Forward                  | Reverse                  |
|---------------|--------------------------|--------------------------|
| PNPO          | AGGCTGTTCAAGTGCCTGAC     | AACATGCGAGCAGAGGGTTT     |
| INF- $\alpha$ | GACTCCATCTTGGCTGTGA      | TGATTTCTGCTCTGACAACCT    |
| INF- $\beta$  | CAACTTGCTTGGATTCCTACAAAG | TATTCAAGCCTCCCATTCAATTG  |
| INF- $\rho$   | TGGCTTTTCAGCTCTGCATC     | CCGCTACATCTGAATGACCTG    |
| IFNAR1        | GTGATACACATCTCTCCTGG     | GTATAATCCCATTTAAGAACATAG |
| IFNAR2        | GAGTAAACCAGAAGATTTGAAG   | CGTGTTTGAATTAACCTTGTC    |
| MDA5/ IFIH1   | AGAGTGGCTGTTTACATTGCC    | GCTGTTCAACGTAGCAGTACCTT  |
| IFITM1        | ACTCCGTGAAGTCTAGGGACA    | TGTCACAGAGCCGAATACCAG    |
| IFITM2        | ATTGTGCAAACCTTCTCTCCTG   | ACCCCCAGCATAGCCACTTCTT   |
| TGF $\beta$ 1 | CAATTCCTGGCGATACCTCAG    | GCACAACCTCCGGTGACATCAA   |
| TGF $\beta$ 2 | CAGCACACTCGATATGGACCA    | CCTCGGGCTCAGGATAGTCT     |
| IL34          | AAGGTGGAATCCGTGTTGTCC    | AGCTTTGTTTACAGCAGGAGC    |
| Col9A2        | TCCCTGGTGAGATTGGAATCC    | TTGGTTGGACACAGGAAATCC    |
| IL1 $\beta$   | ATGATGGCTTATTACAGTGGCAA  | GTCGGAGATTCTGATGCTGGA    |
| TNF $\alpha$  | CCTCTCTCTAATCAGCCCTCTG   | GAGGACCTGGGAGTAGATGAG    |
| iNOS          | GCAGAATGTGACCATCATGG     | ACAACCTTGGTGTGAAGGC      |
| ROS           | TTGTTATGCACCCATCCAAA     | CCTGCTGCTCGGATATGAAT     |
| Glast         | TGTGGAGCAGCACTGATTTTC    | AGCCAAACCTCCTCTTTGGT     |
| Iba1          | ATGAGCCAAACCAGGGATTTAC   | GGGATCGTCTAGGAATTGCTTGT  |
